# Supplementary material for: Calculating the economic burden of presumed microbial keratitis admissions at a tertiary referral centre in the UK
Source: PubMed Central journal article supplement (PMC8302743; doi:10.1038/s41433-020-01333-9), 2020-12-07
Supplement: 41433_2020_1333_MOESM3_ESM.pdf [file 41433_2020_1333_MOESM3_ESM.pdf]

## Supplementary Figure 1

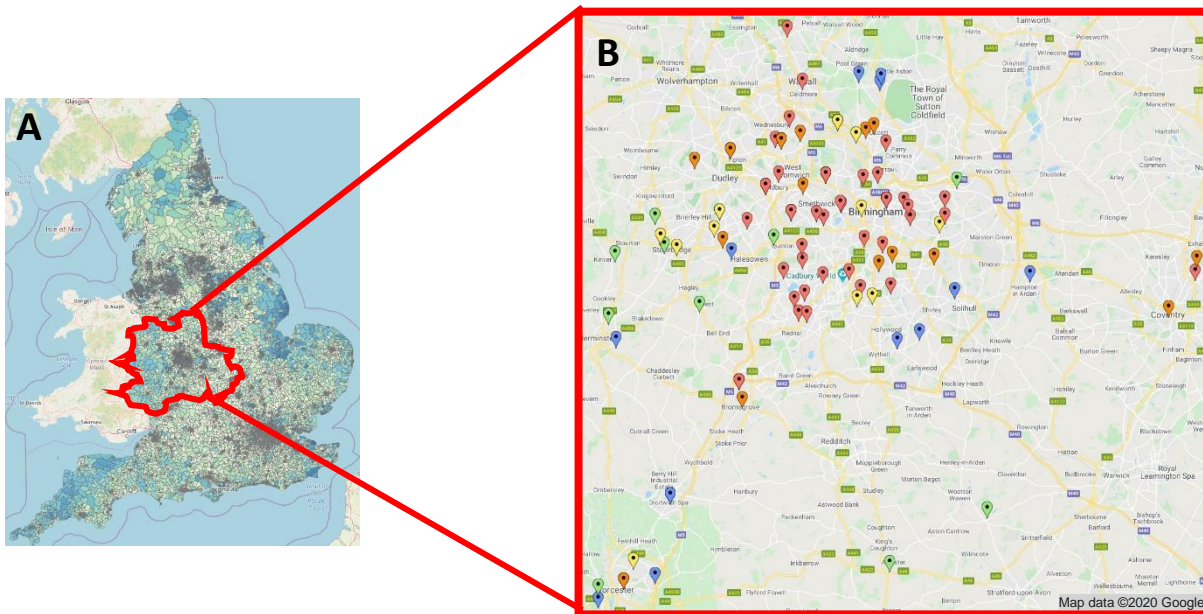

A) Indices of Deprivation Rank Map from Gov.uk 2019

B) Location of patients from grouped by IMD Deciles.

|                                                                                     |                                  |
|-------------------------------------------------------------------------------------|----------------------------------|
|   | Most Deprived (IMD Deciles 1-2)  |
|  | IMD Deciles 3-4                  |
|  | IMD Deciles 5-6                  |
|  | IMD Deciles 7-8                  |
|  | Most Affluent (IMD Deciles 9-10) |
